# Supplementary material for: Molecular Dynamics Mappings of the CCT/TRiC Complex-Mediated Protein Folding Cycle Using Diffracted X-ray Tracking
Source: MDPI journal article supplement (doi:10.3390/ijms241914850), 2023-10-03
Supplement: s1 [file s1]

## Supplementary information

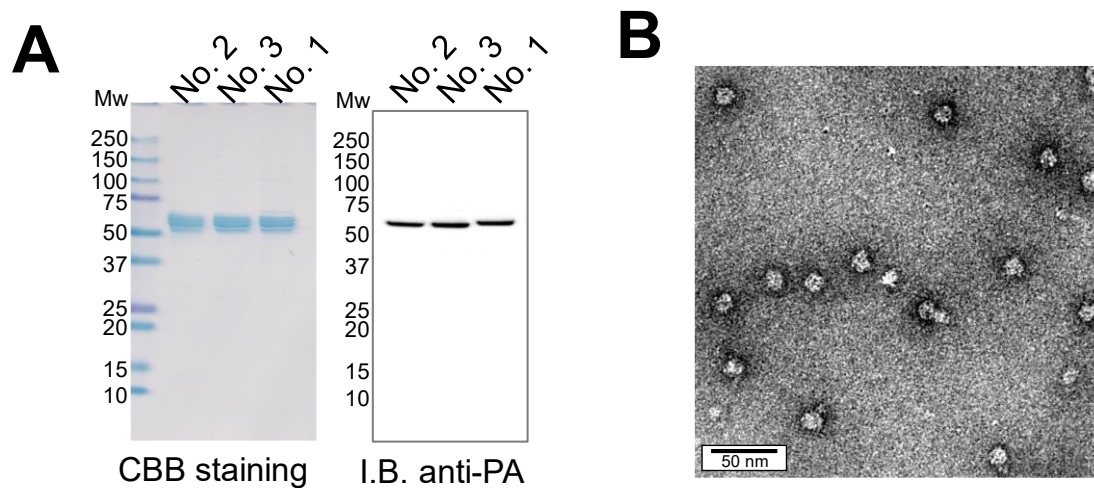

### **Supplementary Figure S1. Purified CCT Complex Proteins**

(A) The purified CCT complex proteins with PA-tag with three different regions (No.1, No.2, No.3) were detected using Coomassie Brilliant Blue (CBB) staining (left) and western blotting analysis with an anti-rabbit monoclonal PA-tag antibody (right). (B) The CCT complex was visualized by negative-stain electron microscopy (EM), with No.2 used as a representative example.

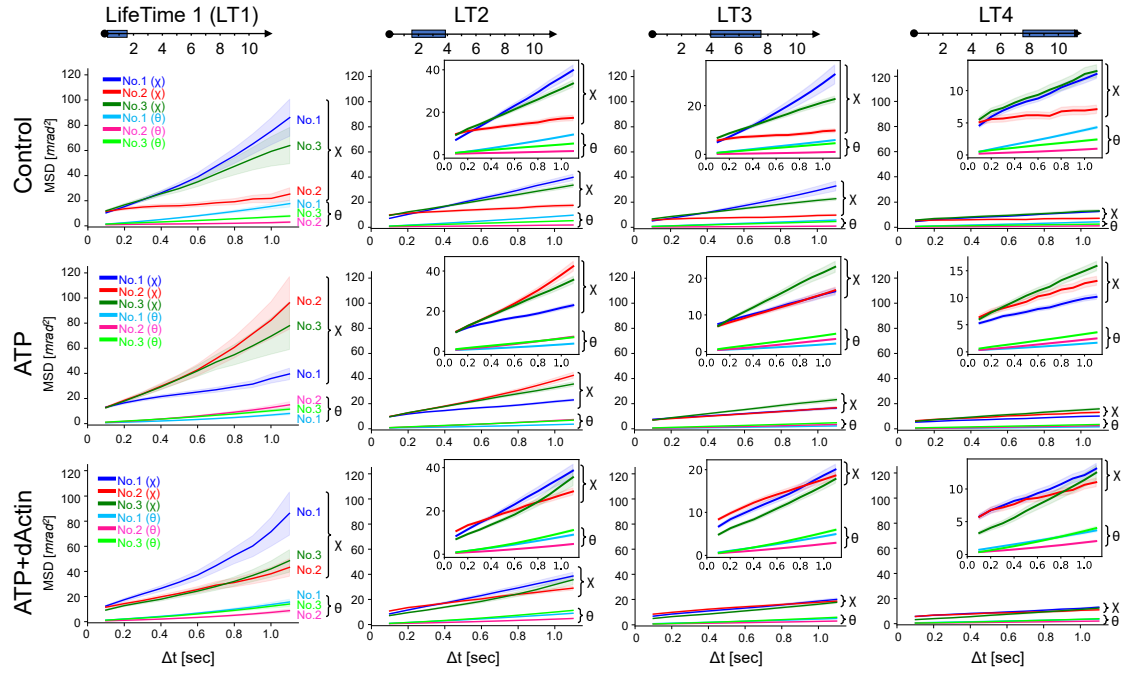

**Supplementary Figure S2. Mean Square Displacement (MSD) Curves of the CCT Complex Motion for the  $\chi$  Axis under Lifetime Classification**

From left to right, the MSD curves for LifeTime 1 (LT1), LT2, LT3, and LT4 are shown, and the results for the Control, ATP, and ATP+dActin conditions are shown from top to bottom. The insets on the right above are zoomed-in views of the Y-axis (MSD values) of the graphs for each condition of LT2, LT3, and LT4. The 95% confidence levels are indicated with shading.

| Condition  |      | LT1                 | LT2                 | LT3                 | LT4                 |
|------------|------|---------------------|---------------------|---------------------|---------------------|
| Control    | No.1 | 4.70 ( $\pm 0.83$ ) | 2.04 ( $\pm 0.05$ ) | 1.73 ( $\pm 0.17$ ) | 0.48 ( $\pm 0.06$ ) |
|            | No.2 | 0.74 ( $\pm 0.20$ ) | 0.46 ( $\pm 0.06$ ) | 0.23 ( $\pm 0.05$ ) | 0.12 ( $\pm 0.04$ ) |
|            | No.3 | 3.31 ( $\pm 0.29$ ) | 1.48 ( $\pm 0.04$ ) | 1.00 ( $\pm 0.03$ ) | 0.46 ( $\pm 0.04$ ) |
| ATP        | No.1 | 1.51 ( $\pm 0.26$ ) | 0.78 ( $\pm 0.09$ ) | 0.55 ( $\pm 0.01$ ) | 0.30 ( $\pm 0.03$ ) |
|            | No.2 | 5.07 ( $\pm 1.06$ ) | 2.01 ( $\pm 0.22$ ) | 0.60 ( $\pm 0.01$ ) | 0.42 ( $\pm 0.04$ ) |
|            | No.3 | 4.06 ( $\pm 0.32$ ) | 1.60 ( $\pm 0.05$ ) | 1.01 ( $\pm 0.03$ ) | 0.61 ( $\pm 0.03$ ) |
| ATP+dActin | No.1 | 4.35 ( $\pm 1.14$ ) | 1.87 ( $\pm 0.05$ ) | 0.81 ( $\pm 0.05$ ) | 0.44 ( $\pm 0.03$ ) |
|            | No.2 | 1.90 ( $\pm 0.20$ ) | 1.11 ( $\pm 0.07$ ) | 0.62 ( $\pm 0.07$ ) | 0.31 ( $\pm 0.05$ ) |
|            | No.3 | 2.34 ( $\pm 0.44$ ) | 1.74 ( $\pm 0.28$ ) | 0.79 ( $\pm 0.05$ ) | 0.58 ( $\pm 0.04$ ) |

**Supplementary Table S1. Summary of the Angular Diffusion Coefficient in  $\chi$  directions**

After classifying the trajectories into these four lifetime groups (Supplementary Figure 2 and Figure 4), MSD curves were fitted at the time interval of 0.1 second with least-squares fitting to the following equation,  $MSD = 4Dt + A$ , where MSD is the mean square angular displacement, D (mrad<sup>2</sup>/s) is the angular diffusion constant, t is time interval, A is intercept of the MSD curve.
